# Supplementary material for: Genome-wide association analysis of chronic lymphocytic leukaemia, Hodgkin lymphoma and multiple myeloma identifies pleiotropic risk loci
Source: PubMed Central journal article supplement (PMC5253627; doi:10.1038/srep41071), 2017-01-23

**Genome-wide association analysis of chronic lymphocytic leukaemia, Hodgkin lymphoma and multiple myeloma identifies pleiotropic risk loci**

**Supplementary Data**

Philip J Law, Amit Sud, Jonathan S Mitchell, Marc Henrion, Giulia Orlando, Oleg Lenive, Peter Broderick, Helen E Speedy, David C Johnson, Martin Kaiser, Niels Weinhold, Rosie Cooke, Nicola J Sunter, Graham H Jackson, Geoffrey Summerfield, Robert J Harris, Andrew R Pettitt, David J Allsup, Jonathan Carmichael, James R Bailey, Guy Pratt, Thahira Rahman, Chris Pepper, Chris Fegan, Elke Pogge von Strandmann, Andreas Engert, Asta Försti, Bowang Chen, Miguel Inacio da Silva Filho, Hauke Thomsen, Per Hoffmann, Markus M Noethen, Lewin Eisele, Karl-Heinz Jöckel, James M Allan, Anthony J Swerdlow, Hartmut Goldschmidt, Daniel Catovsky, Gareth J Morgan, Kari Hemminki, Richard S Houlston

**Supplementary Table 1:** Summary of the sample sets used in the study. The numbers shown are after QC measures.

| Cancer                               | Cases        | Genotyping platform           | Controls                 | Genotyping platform                                                  | Imputation filter | Number of variants            |
|--------------------------------------|--------------|-------------------------------|--------------------------|----------------------------------------------------------------------|-------------------|-------------------------------|
| <b>Chronic lymphocytic leukaemia</b> |              |                               |                          |                                                                      |                   |                               |
| CLL-UK1                              | 503          | Illumina Human 317K array     | 2,700*                   | Illumina Human 1.2M-Duo Custom_v1 Array BeadChip                     | 0.4               | 10,472,381                    |
| CLL-UK2                              | 1,339        | Illumina OmniExpress BeadChip | 2,500*                   | Illumina Human 1.2M-Duo Custom_v1 Array BeadChip                     | 0.4               | 10,524,731                    |
| <b>Multiple myeloma</b>              |              |                               |                          |                                                                      |                   |                               |
| MM-UK                                | 2,282        | Illumina OmniExpress BeadChip | 5,197*                   | Illumina Human 1.2M-Duo Custom_v1 Array BeadChip                     | 0.4               | 10,504,468                    |
| MM-GER                               | 1,508        | Illumina OmniExpress BeadChip | 2,107 <sup>†</sup>       | Illumina Human Omni1-Quad BeadChips or Illumina OmniExpress BeadChip | 0.4               | 10,539,844                    |
| <b>Hodgkin lymphoma</b>              |              |                               |                          |                                                                      |                   |                               |
| HL-UK                                | 589          | Illumina 660w-Quad BeadChip   | 5,199*                   | Illumina Human 1.2M-Duo Custom_v1 Array BeadChip                     | 0.4               | 10,507,971                    |
| HL-GER                               | 876          | Illumina OmniExpress BeadChip | 1,218 <sup>†</sup>       | Illumina OmniExpress BeadChip                                        | 0.4               | 10,553,927                    |
| <b>Total</b>                         | <b>7,097</b> |                               | <b>7,324<sup>‡</sup></b> |                                                                      |                   | <b>10,806,625<sup>‡</sup></b> |

\* Controls comprise of the WTCCC 1958 Birth Cohort (1958BC) and National Blood Service (NBS) which are split between UK-CLL1 and UK-CLL2 respectively.

<sup>†</sup> Controls comprise of the Heinz-Nixdorf Recall study (HNR)

<sup>‡</sup>The number of unique individuals after accounting for overlapping controls

<sup>‡</sup>Number of unique variants present in at least two diseases

**Supplementary Table 2:** Table of ASSET results which showed moderate effects. BCM: B-cell malignancy. Odds-ratios (OR) were calculated based on allele 2.

| Locus    | SNP         | Position (bp) | Allele 1 | Allele 2 | ASSET 2-sided<br>P-value | Disease Group 1 |                  |                       | Disease Group 2 |                  |                       |
|----------|-------------|---------------|----------|----------|--------------------------|-----------------|------------------|-----------------------|-----------------|------------------|-----------------------|
|          |             |               |          |          |                          | BCM             | OR               | P-value               | BCM             | OR               | P-value               |
| 1p35.2   | rs148297606 | 31862772      | G        | C        | 4.02x10 <sup>-6</sup>    | CLL,HL          | 2.09 (1.53-2.86) | 4.02x10 <sup>-6</sup> | -               | -                | -                     |
| 11q22.1  | rs4278486   | 98801158      | T        | C        | 1.05x10 <sup>-5</sup>    | CLL             | 1.16 (1.07-1.25) | 1.93x10 <sup>-4</sup> | HL              | 0.88 (0.81-0.96) | 3.58x10 <sup>-3</sup> |
| 12q12    | rs10748274  | 38233264      | C        | T        | 9.55x10 <sup>-6</sup>    | CLL,HL          | 1.14 (1.08-1.21) | 9.55x10 <sup>-6</sup> | -               | -                | -                     |
| 12q21.2  | rs181181503 | 74669967      | T        | C        | 3.41x10 <sup>-7</sup>    | CLL,HL          | 2.56 (1.79-3.68) | 3.41x10 <sup>-7</sup> | -               | -                | -                     |
| 13q21.31 | rs1576377   | 61260524      | T        | C        | 3.58x10 <sup>-6</sup>    | HL              | 1.20 (1.09-1.32) | 3.37x10 <sup>-4</sup> | CLL             | 0.86 (0.79-0.94) | 6.50x10 <sup>-4</sup> |
| 18p11.31 | rs634212    | 6033023       | G        | T        | 5.11x10 <sup>-5</sup>    | CLL,HL          | 1.37 (1.14-1.63) | 6.48x10 <sup>-4</sup> | MM              | 0.80 (0.68-0.94) | 5.85x10 <sup>-3</sup> |
| 19p13.11 | rs73005220  | 16272689      | A        | G        | 1.30x10 <sup>-6</sup>    | -               | -                | -                     | CLL,MM          | 0.75 (0.67-0.85) | 1.30x10 <sup>-6</sup> |
| 22q12.3  | rs9306298   | 35677701      | T        | C        | 5.43x10 <sup>-5</sup>    | CLL,HL          | 1.12 (1.06-1.19) | 8.38x10 <sup>-5</sup> | MM              | 0.95 (0.9-1.00)  | 0.05                  |
| 22q13.33 | rs131821    | 50950076      | A        | AT       | 7.49x10 <sup>-8</sup>    | CLL,MM          | 1.14 (1.09-1.19) | 7.49x10 <sup>-8</sup> | -               | -                | -                     |

**Supplementary Table 3:** Results of the eQTL analysis. All SNPs in LD with the SNP identified in the ASSET analysis were analysed for potential eQTL. The MuTHER, Blood eQTL browser and Geuvardis databases were used to investigate lymphoblastoid cells, in addition to data from myeloma plasma cells. Only FDR adjusted  $P < 0.05$  are shown.

| Region   | ASSET SNP                   | Top eQTL SNP                | R <sup>2</sup> | D'   | eQTL Gene                       | MuTHER       |                       | Blood eQTL browser |                       | Geuvardis       |                        | Myeloma  |                        |
|----------|-----------------------------|-----------------------------|----------------|------|---------------------------------|--------------|-----------------------|--------------------|-----------------------|-----------------|------------------------|----------|------------------------|
|          |                             |                             |                |      |                                 | Probe        | FDR adjusted P        | Probe              | FDR adjusted P        | Probe           | FDR adjusted P         | Probe    | FDR adjusted P         |
| 2q13     | rs12711846                  | rs2018707                   | 0.80           | 0.99 | <i>BCL2L11</i>                  | ILMN_1774997 | 2.40x10 <sup>-3</sup> |                    |                       |                 |                        |          |                        |
| 2q37.1   | rs150468793;<br>rs149207840 | rs150468793;<br>rs149207840 | 1.00           | 1.00 | <i>SP140</i>                    |              |                       |                    |                       |                 |                        | 93349_at | 7.26x10 <sup>-5</sup>  |
| 2p23.3   | rs6546149                   | rs6546148                   | 0.85           | 0.98 | <i>ADCY3</i>                    | ILMN_1676893 | 0.02                  |                    |                       |                 |                        |          |                        |
| 3p22.1   | rs6763508                   | rs1016669                   | 0.93           | 0.97 | <i>ULK4</i>                     |              |                       |                    |                       | ENST00000301831 | 4.29x10 <sup>-50</sup> |          |                        |
| 3p24.1   | rs9880772                   | rs11129295                  | 0.72           | 1.00 | <i>EOMES</i><br><i>NCK1-AS1</i> |              |                       | 7320372            | 4.54x10 <sup>-5</sup> |                 |                        |          |                        |
| 3q22.2   | rs11715604                  | rs71630059                  | 0.71           | 1.00 |                                 |              |                       |                    |                       | ENST00000474250 | 1.17x10 <sup>-8</sup>  |          |                        |
| 3q26.2   | rs12638862                  | rs12696304                  | 0.94           | 1.00 | <i>LRRC31</i>                   | ILMN_1803528 | 1.81x10 <sup>-7</sup> |                    |                       |                 |                        |          |                        |
| 5q15     | rs2546191                   | rs9314162                   | 0.97           | 1.00 | <i>ELL2</i>                     |              |                       |                    |                       |                 |                        | 22936_at | 1.82x10 <sup>-28</sup> |
| 6p21.32  | rs210143                    | rs210134                    | 0.90           | 0.98 | <i>CUTA</i>                     |              |                       | 1030427            | 2.20x10 <sup>-9</sup> |                 |                        |          |                        |
| 11q24.1  | rs4525246                   | rs4525246                   | 1.00           | 1.00 | <i>VWA5A</i>                    |              |                       |                    |                       |                 |                        | 4013_at  | 2.76x10 <sup>-3</sup>  |
| 15q15.1  | rs35603048                  | rs35603048                  | 1.00           | 1.00 | <i>EIF2AK4</i>                  |              |                       |                    |                       | ENST00000263791 | 0.04                   |          |                        |
| 16q24.2  | rs4240807                   | rs10863202                  | 0.81           | 0.99 | <i>IRF8</i>                     | ILMN_1666594 | 0.02                  |                    |                       |                 |                        |          |                        |
| 22q13.33 | rs131821                    | rs131821                    | 1.00           | 1.00 | <i>TYMP</i>                     |              |                       |                    |                       |                 |                        | 1890_at  | 1.22x10 <sup>-4</sup>  |

**Supplementary Table 4:** HaploReg results showing enrichment of regulatory elements in primary haematopoietic stem cells and GM12878 cells (see separate file)

**Supplementary Table 5:** Results of gene set enrichment analysis in BCM risk using i-GSEA4GWAS v2. 8 pathways with FDR<0.05 were identified.

| Pathway                                                             | FDR   | eQTL <i>P</i> -value   | # Significantly enriched peaks ( <i>P</i> -value<0.05) |       |              |          |         |
|---------------------------------------------------------------------|-------|------------------------|--------------------------------------------------------|-------|--------------|----------|---------|
|                                                                     |       |                        | DNase-seq                                              | FAIRE | TFBS-PeakSeq | TFBS-SPP | Histone |
| KEGG: antigen processing and presentation                           | 0.001 | 2.34x10 <sup>-57</sup> | 70                                                     | 7     | 87           | 57       | 128     |
| KEGG: intestinal immune network for IGA production                  | 0.001 | 6.40x10 <sup>-25</sup> | 0                                                      | 3     | 20           | 7        | 5       |
| BioCarta: inflam pathway                                            | 0.001 | 1.84x10 <sup>-18</sup> | 1                                                      | 3     | 12           | 0        | 14      |
| KEGG: cell adhesion molecules cams                                  | 0.001 | 9.04x10 <sup>-58</sup> | 0                                                      | 0     | 11           | 7        | 2       |
| BioCarta: cytokine pathwaY                                          | 0.01  | 1.80x10 <sup>-8</sup>  | 0                                                      | 3     | 9            | 0        | 11      |
| BioCarta: DC pathway                                                | 0.01  | 6.91x10 <sup>-14</sup> | 0                                                      | 0     | 0            | 1        | 3       |
| GO: G protein signaling coupled to cAMP nucleotide second messenger | 0.01  | 2.70x10 <sup>-85</sup> | 0                                                      | 0     | 0            | 0        | 0       |
| GO: cAMP mediated signaling                                         | 0.04  | 3.23x10 <sup>-85</sup> | 0                                                      | 0     | 0            | 0        | 0       |

**Supplementary Figure 1:** Conditional Q-Q plots of pleiotropic association in chronic lymphocytic leukaemia (CLL), Hodgkin lymphoma (HL) and multiple myeloma (MM) in the UK studies. The upward deflection of the observed data associated with smaller expected  $P$ -values seen in the Q-Q plots provides evidence of pleiotropic effects in CLL, HL and MM. CLL conditioned on HL and MM (upper panels). HL conditioned on CLL and MM (middle panels). MM conditioned on CLL and HL (lower panels).

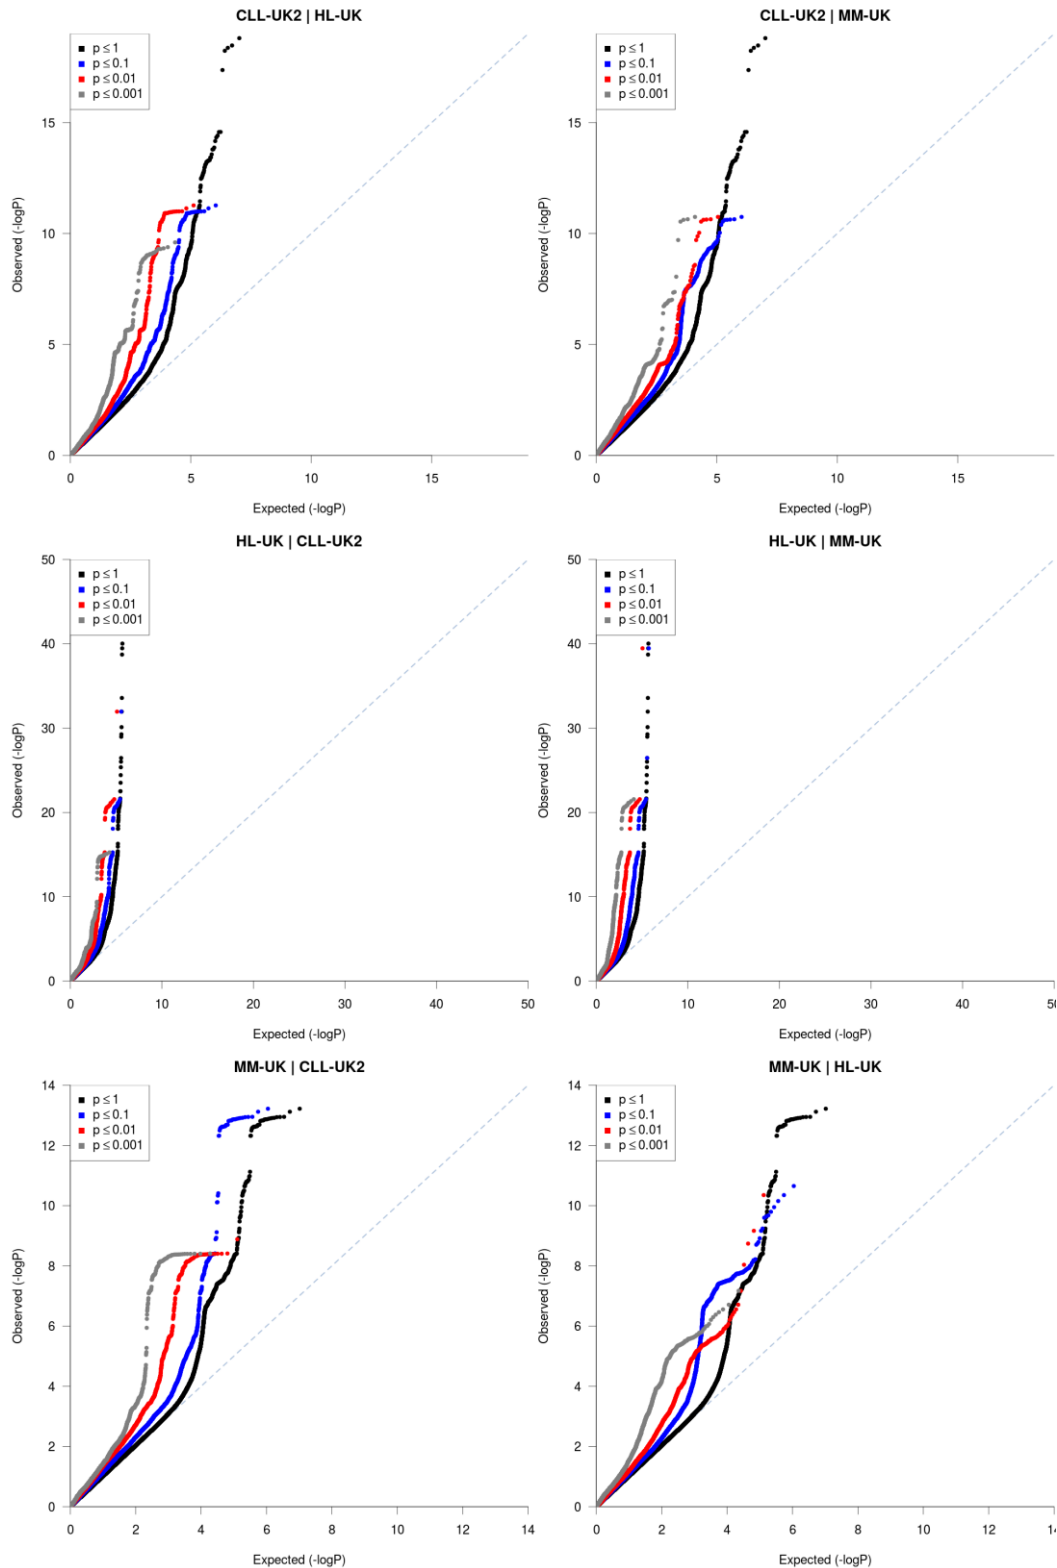

**Supplementary Figure 2:** Association plots show association results of SNPs and recombination rates.  $-\log_{10}(P)$  (y axes) of the SNPs are shown according to their chromosomal positions (x axes). The sentinel SNP is shown as a large circle. The color intensity of each symbol reflects the extent of LD with the sentinel SNP: white ( $r^2 = 0$ ) through to dark red ( $r^2 = 1.0$ ). Genetic recombination rates, estimated from the 1000 Genomes Project, are shown with a light blue line. Physical positions are based on NCBI build 37 of the human genome. Also shown are the relative positions of genes and transcripts mapping to the region of association. The middle track represents the chromatin-state segmentation track (ChromHMM) for lymphoblastoid cells using data from the HapMap ENCODE Project. The top track represents Hi-C promoter contacts in GM12878 cells. The colour intensity of each contact reflects the interaction score.

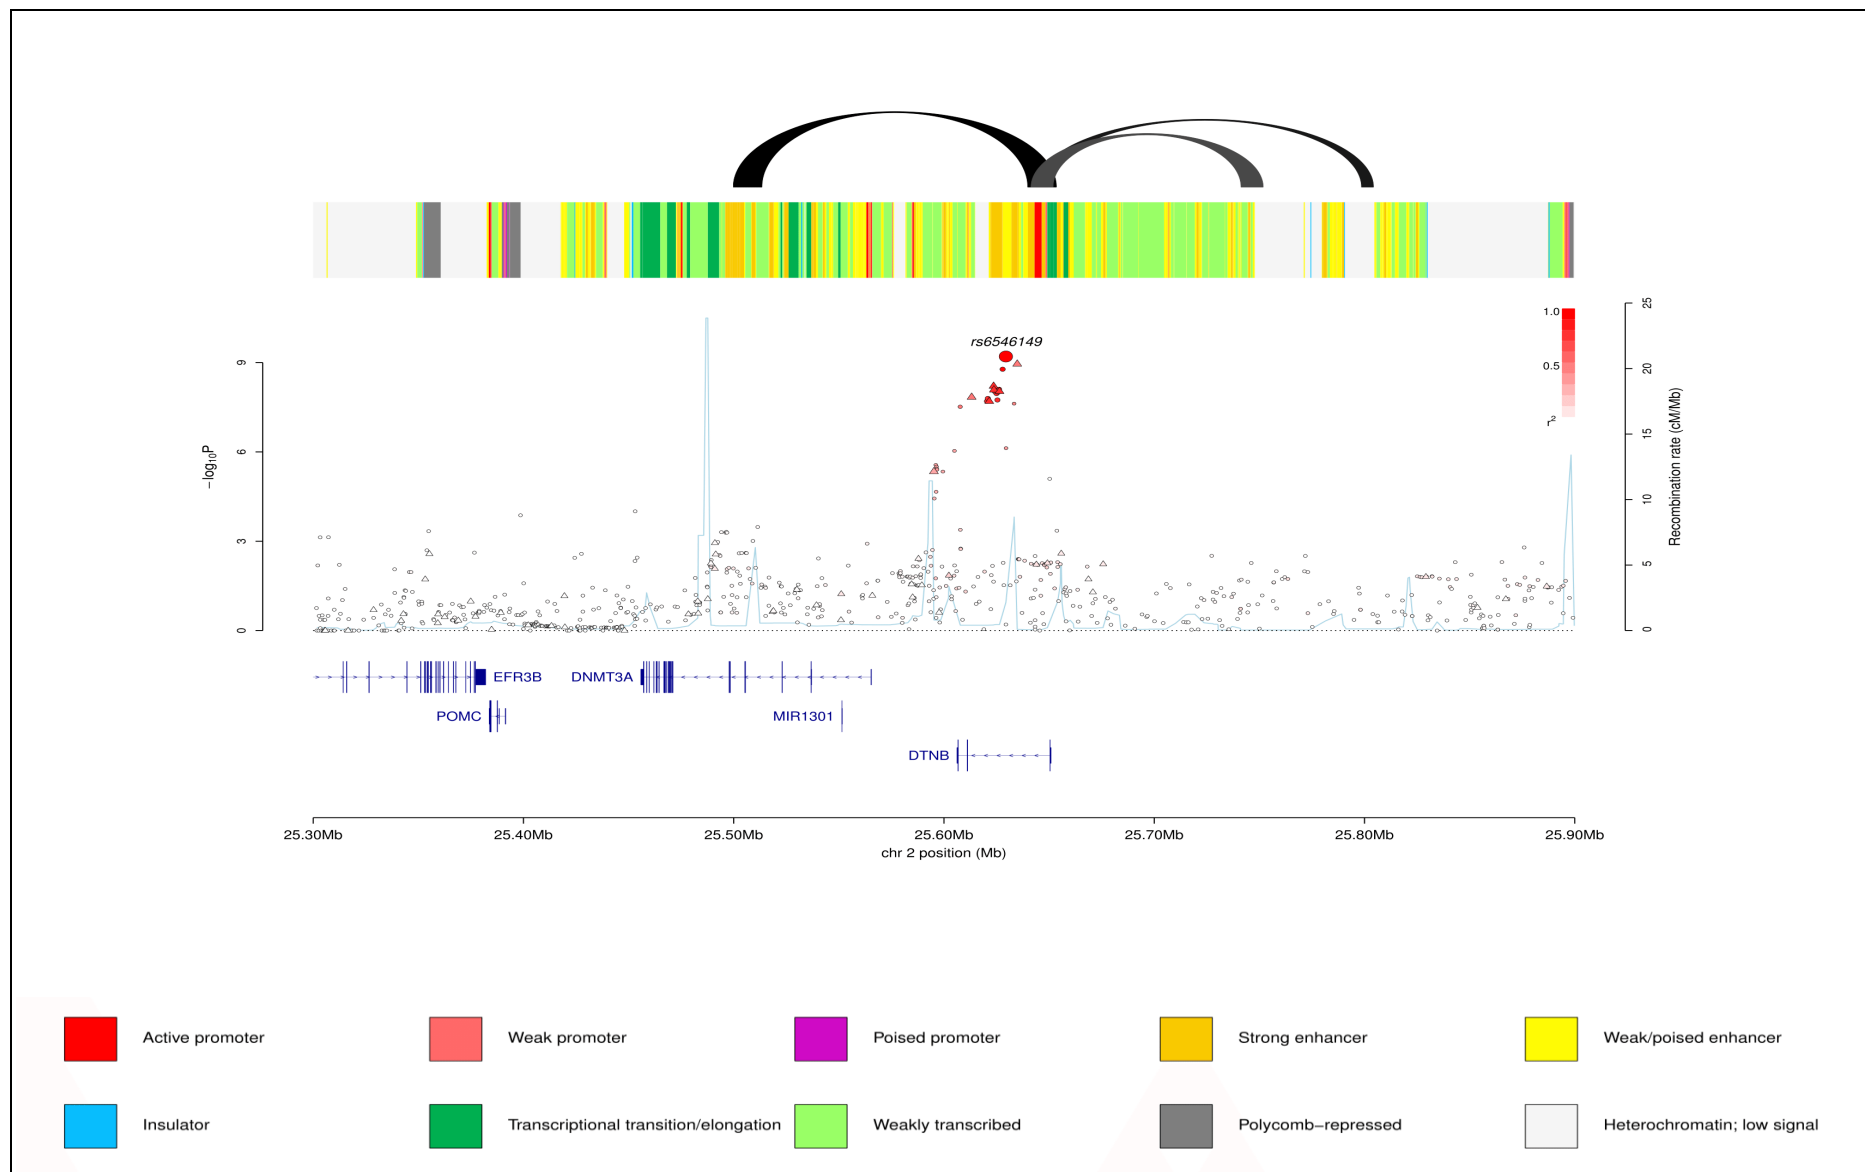



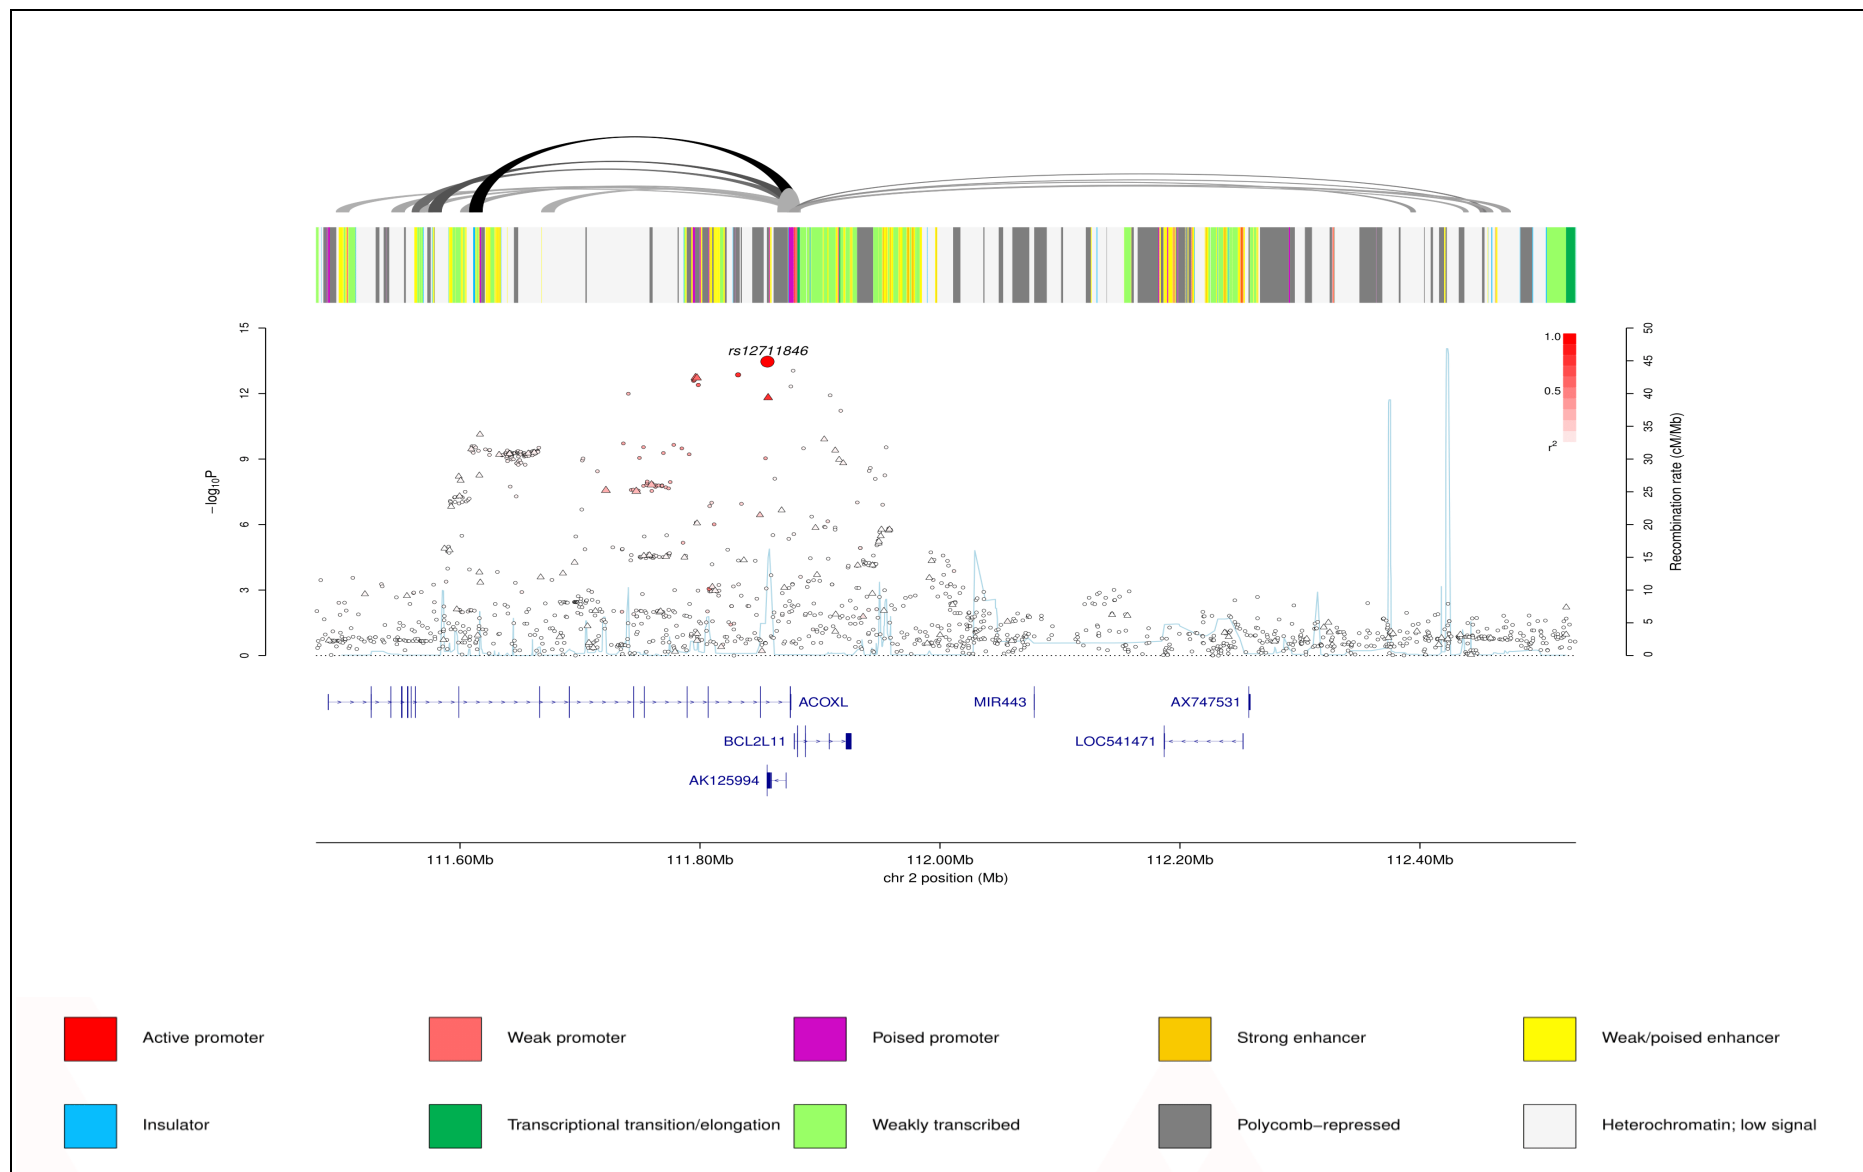

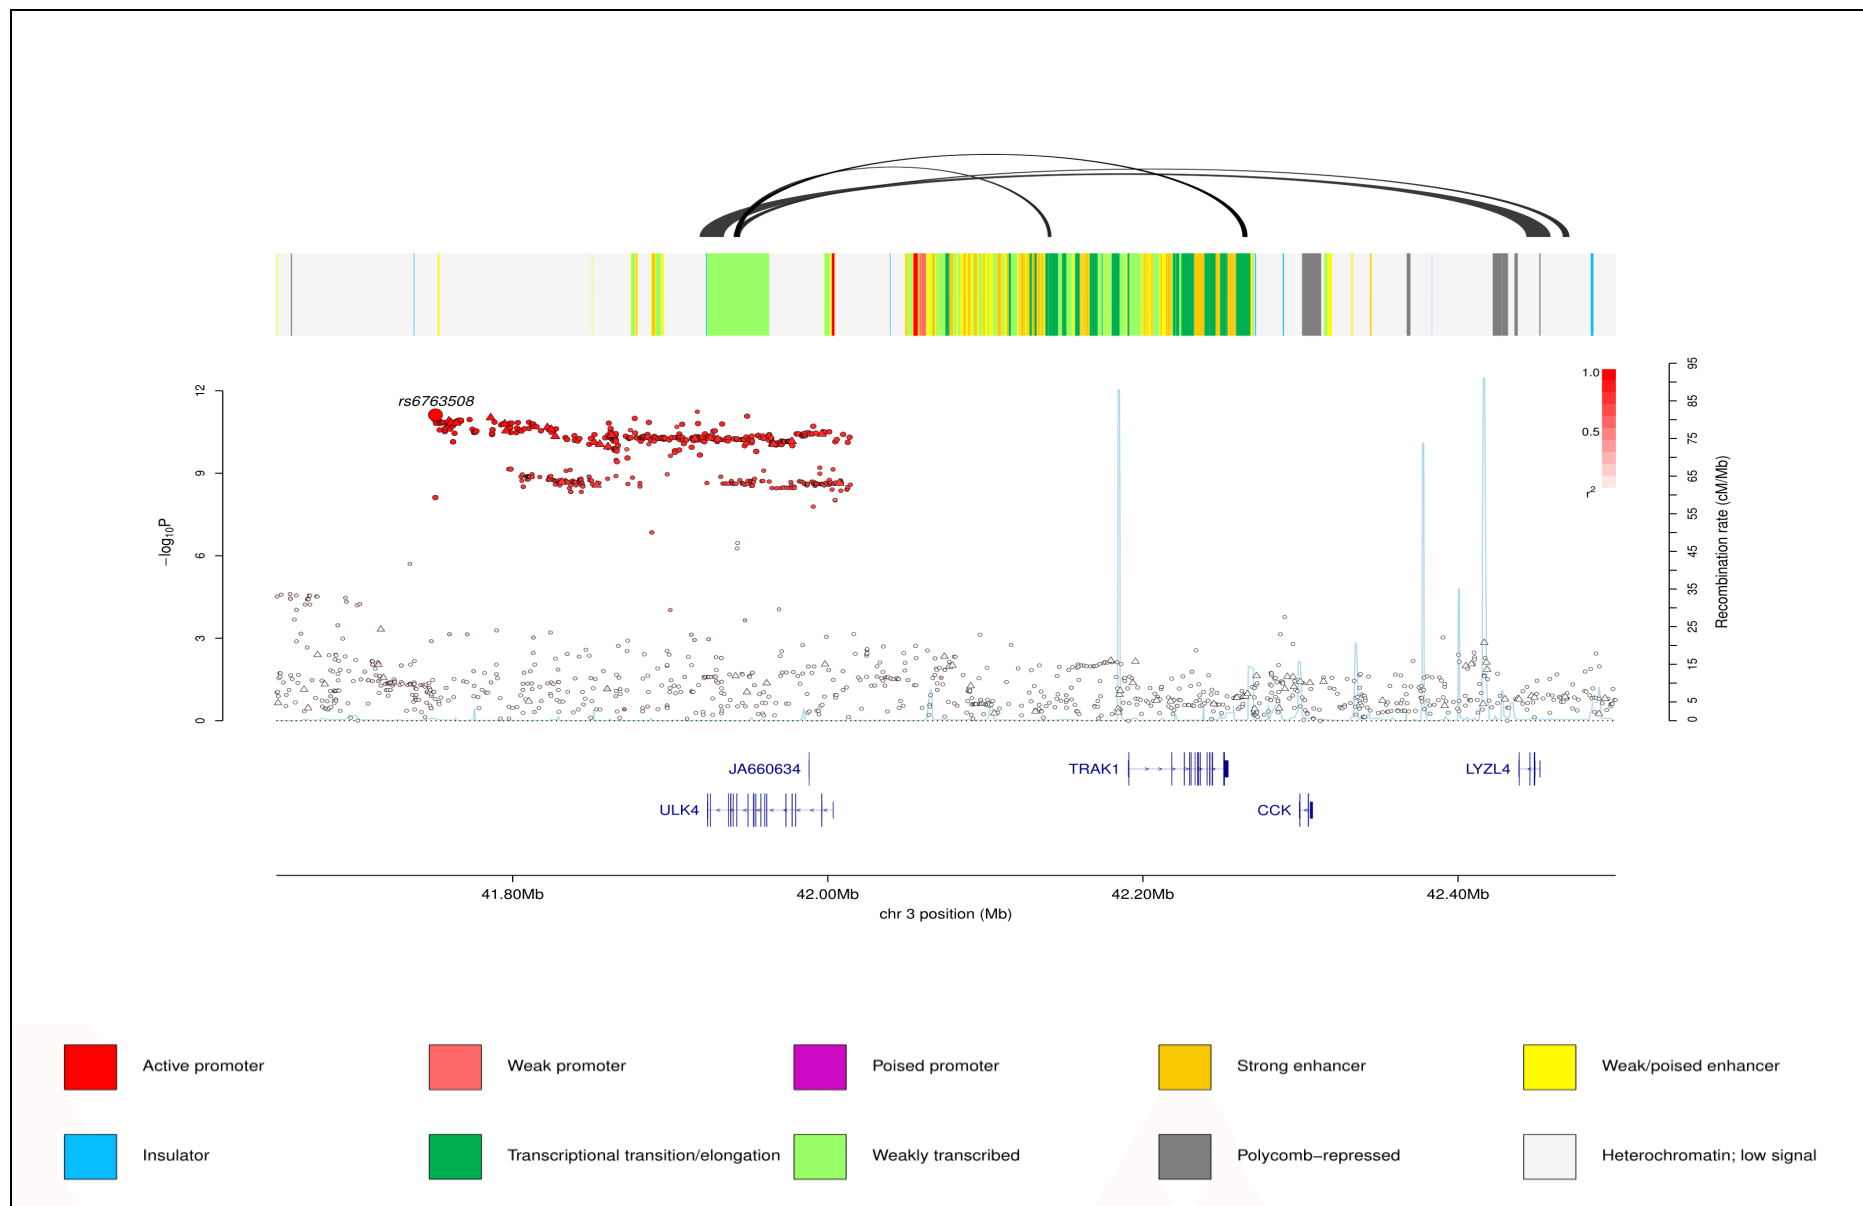

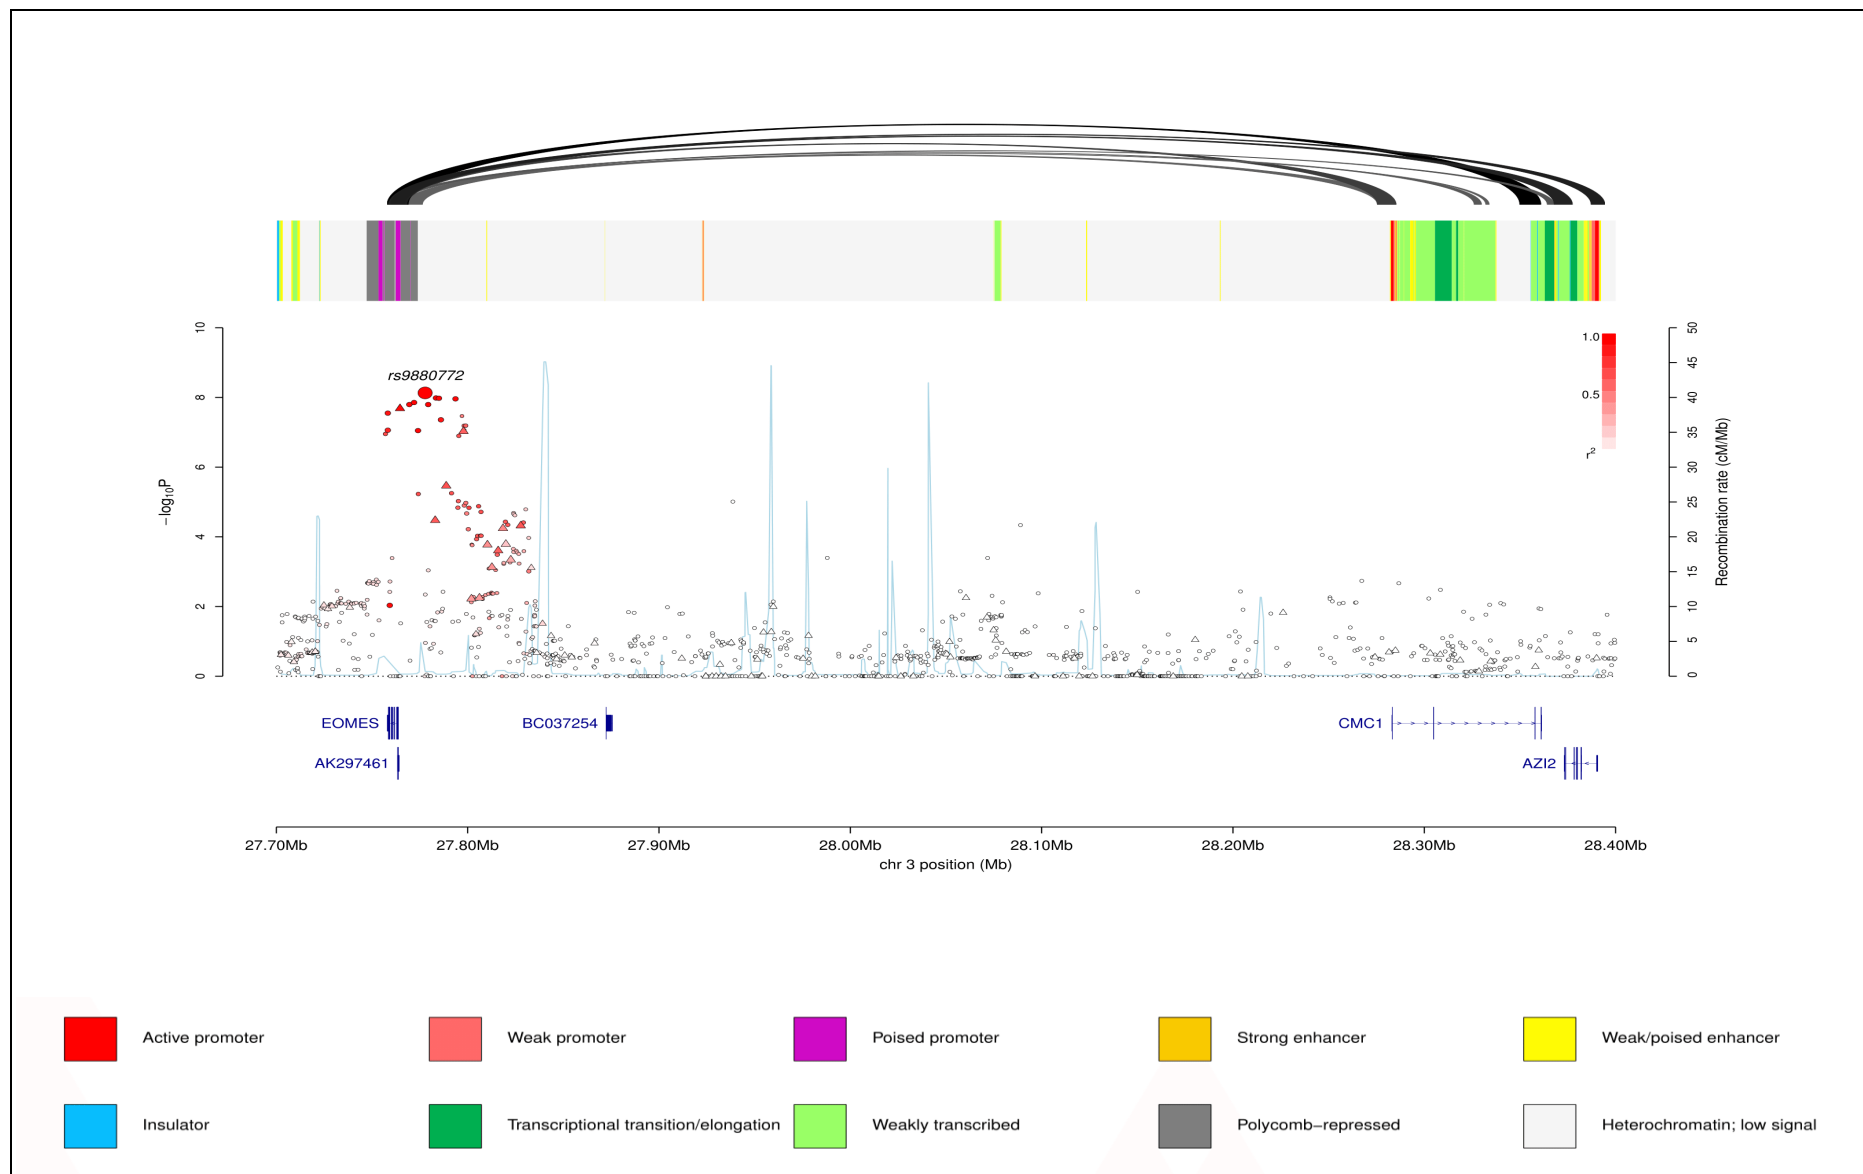

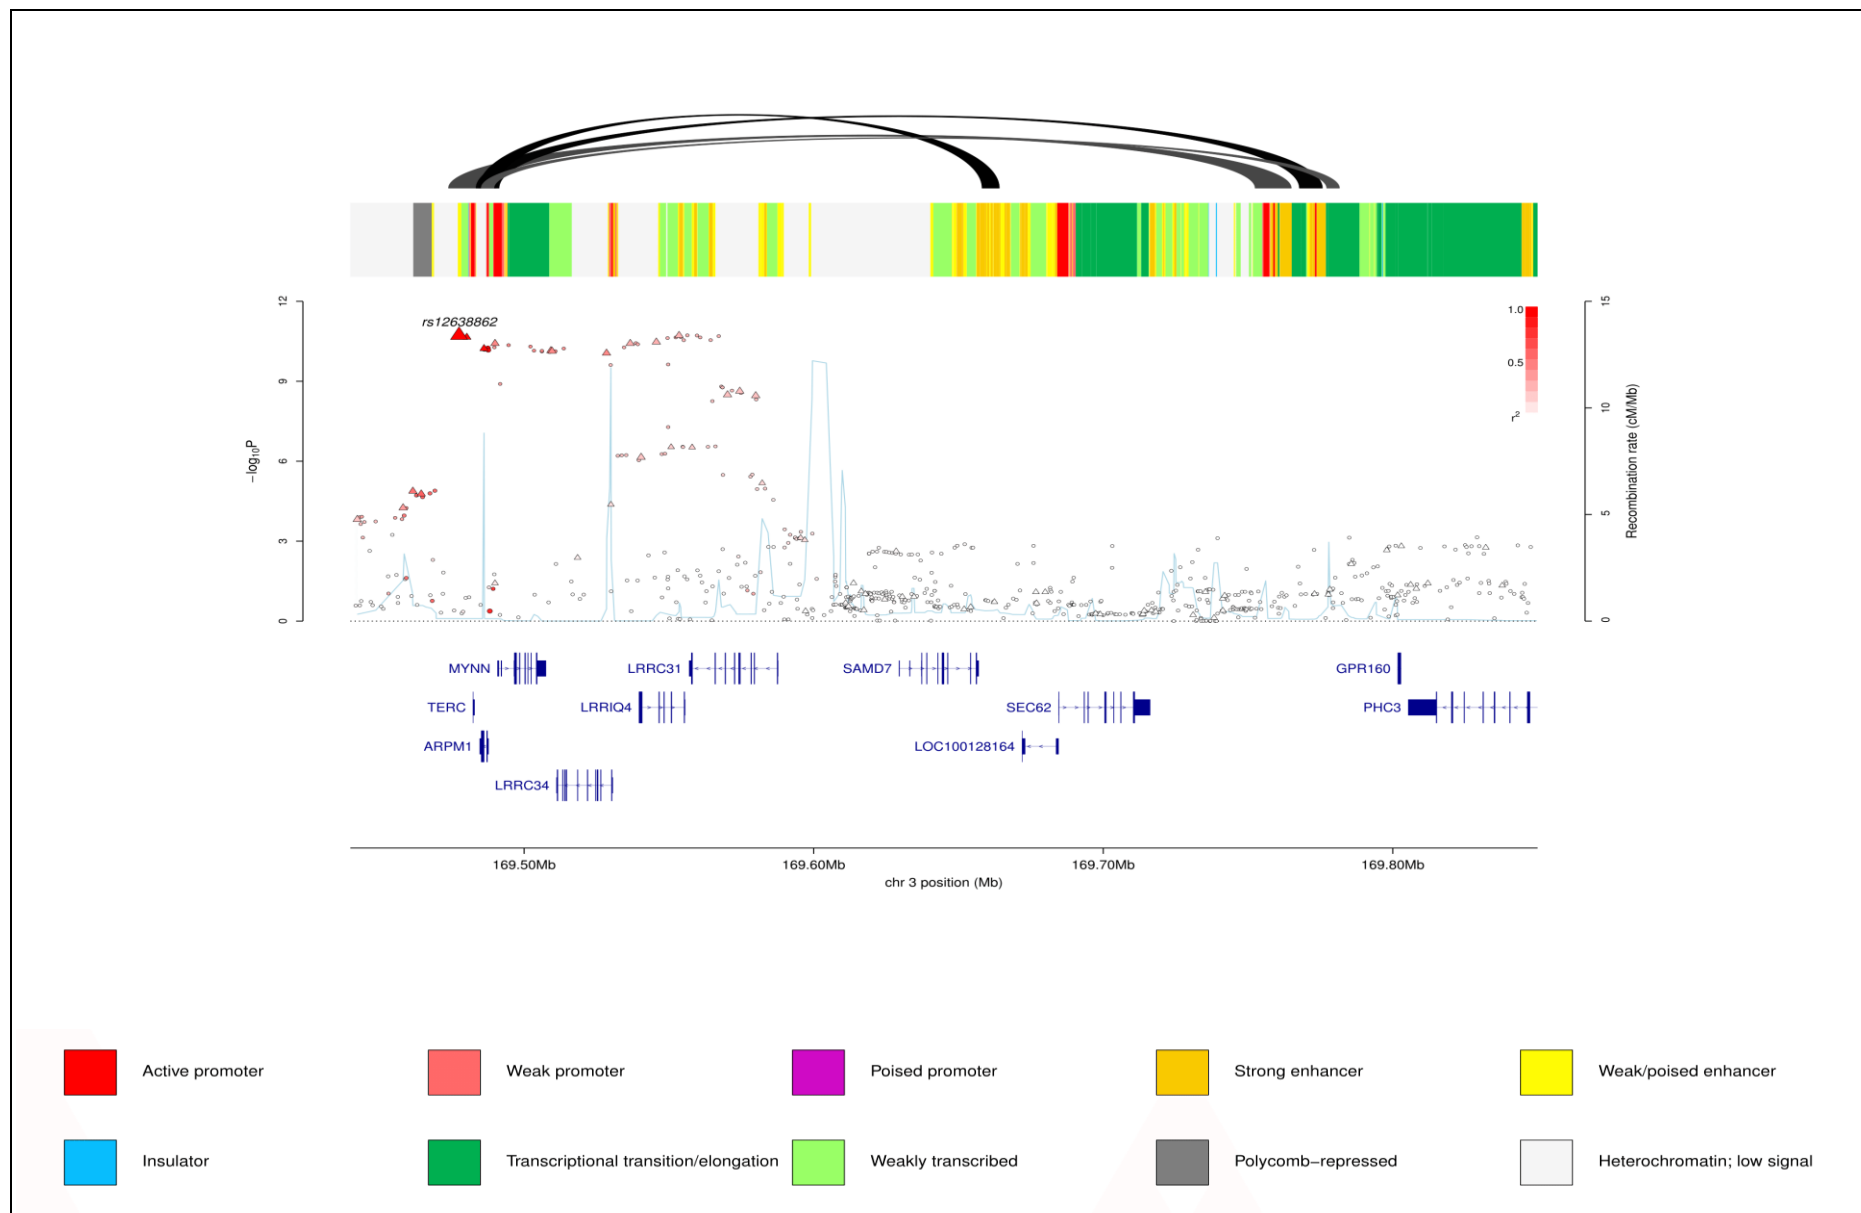

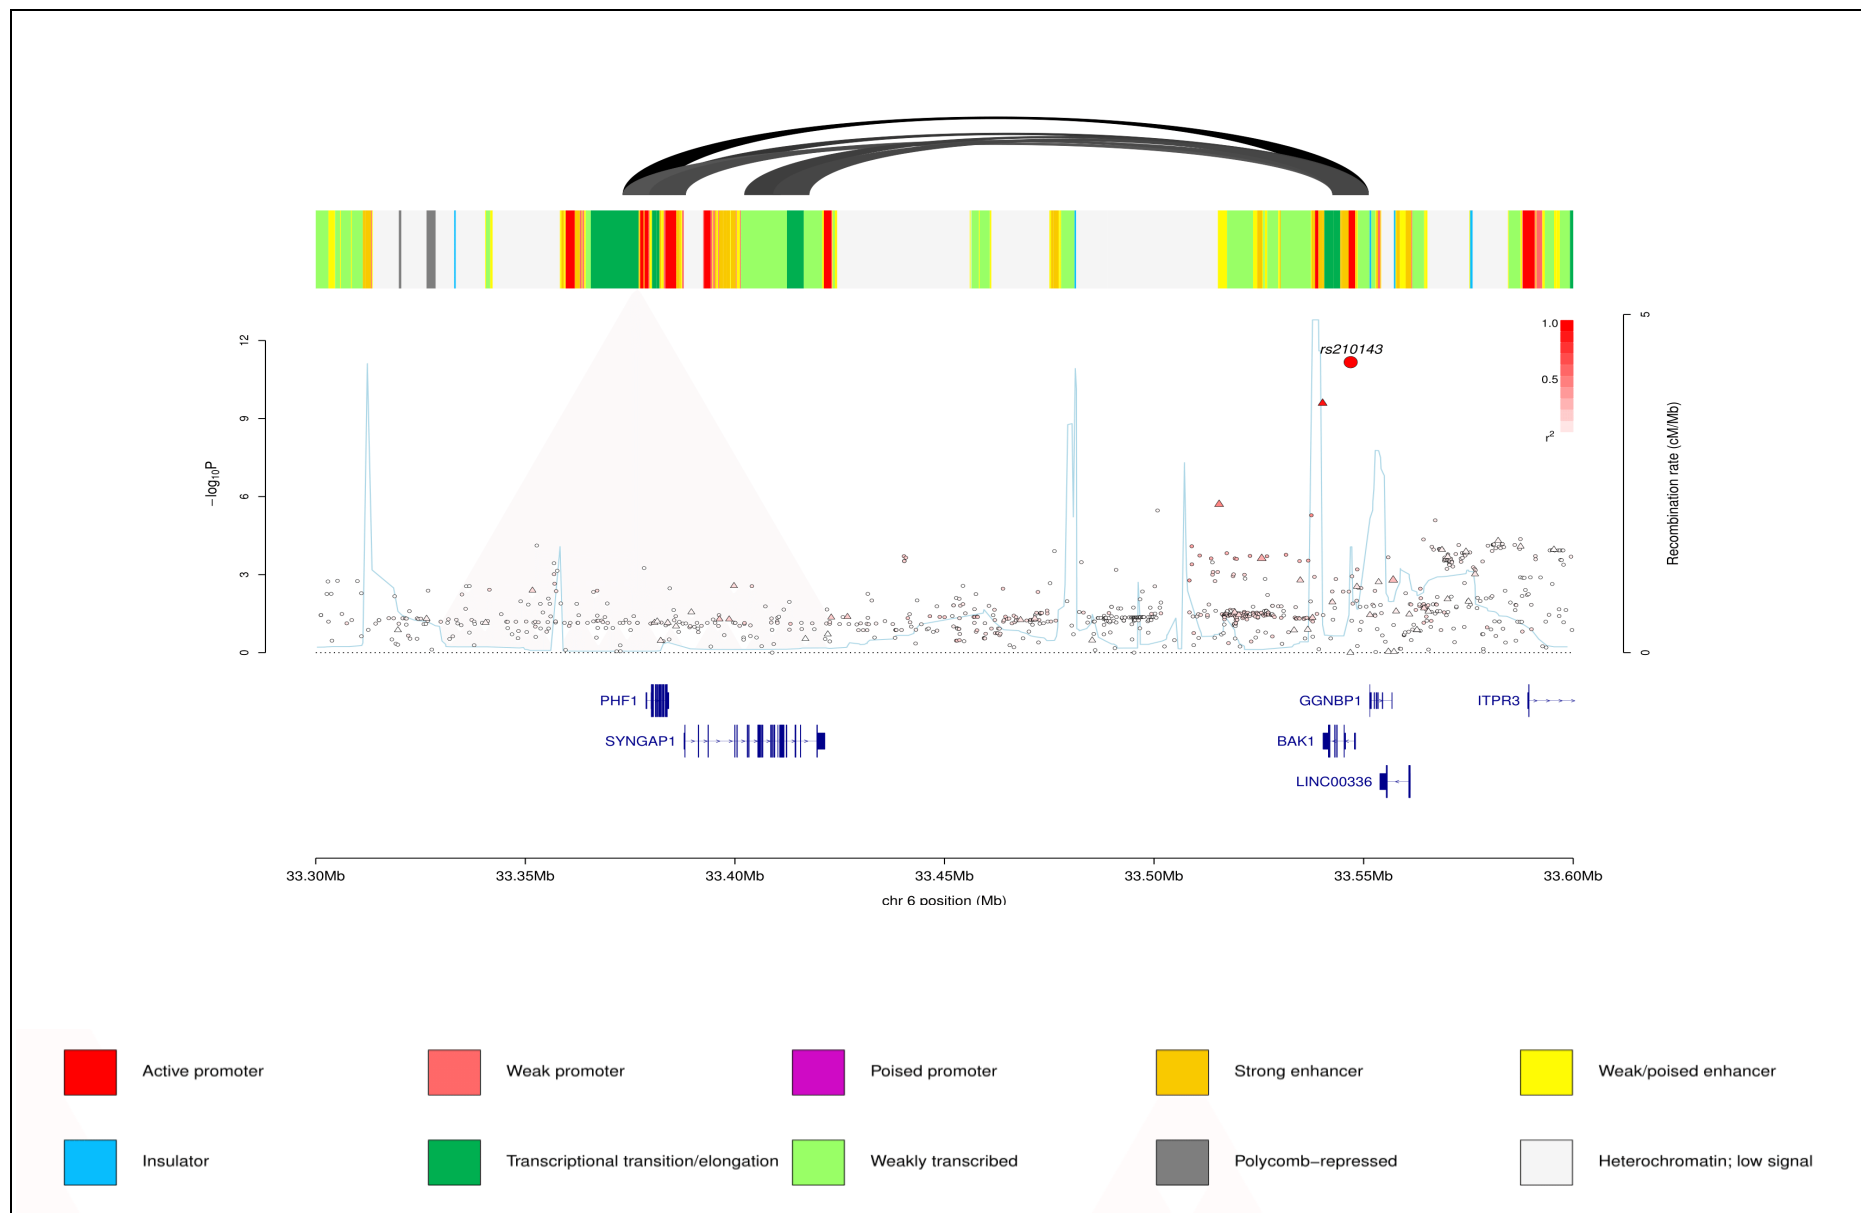

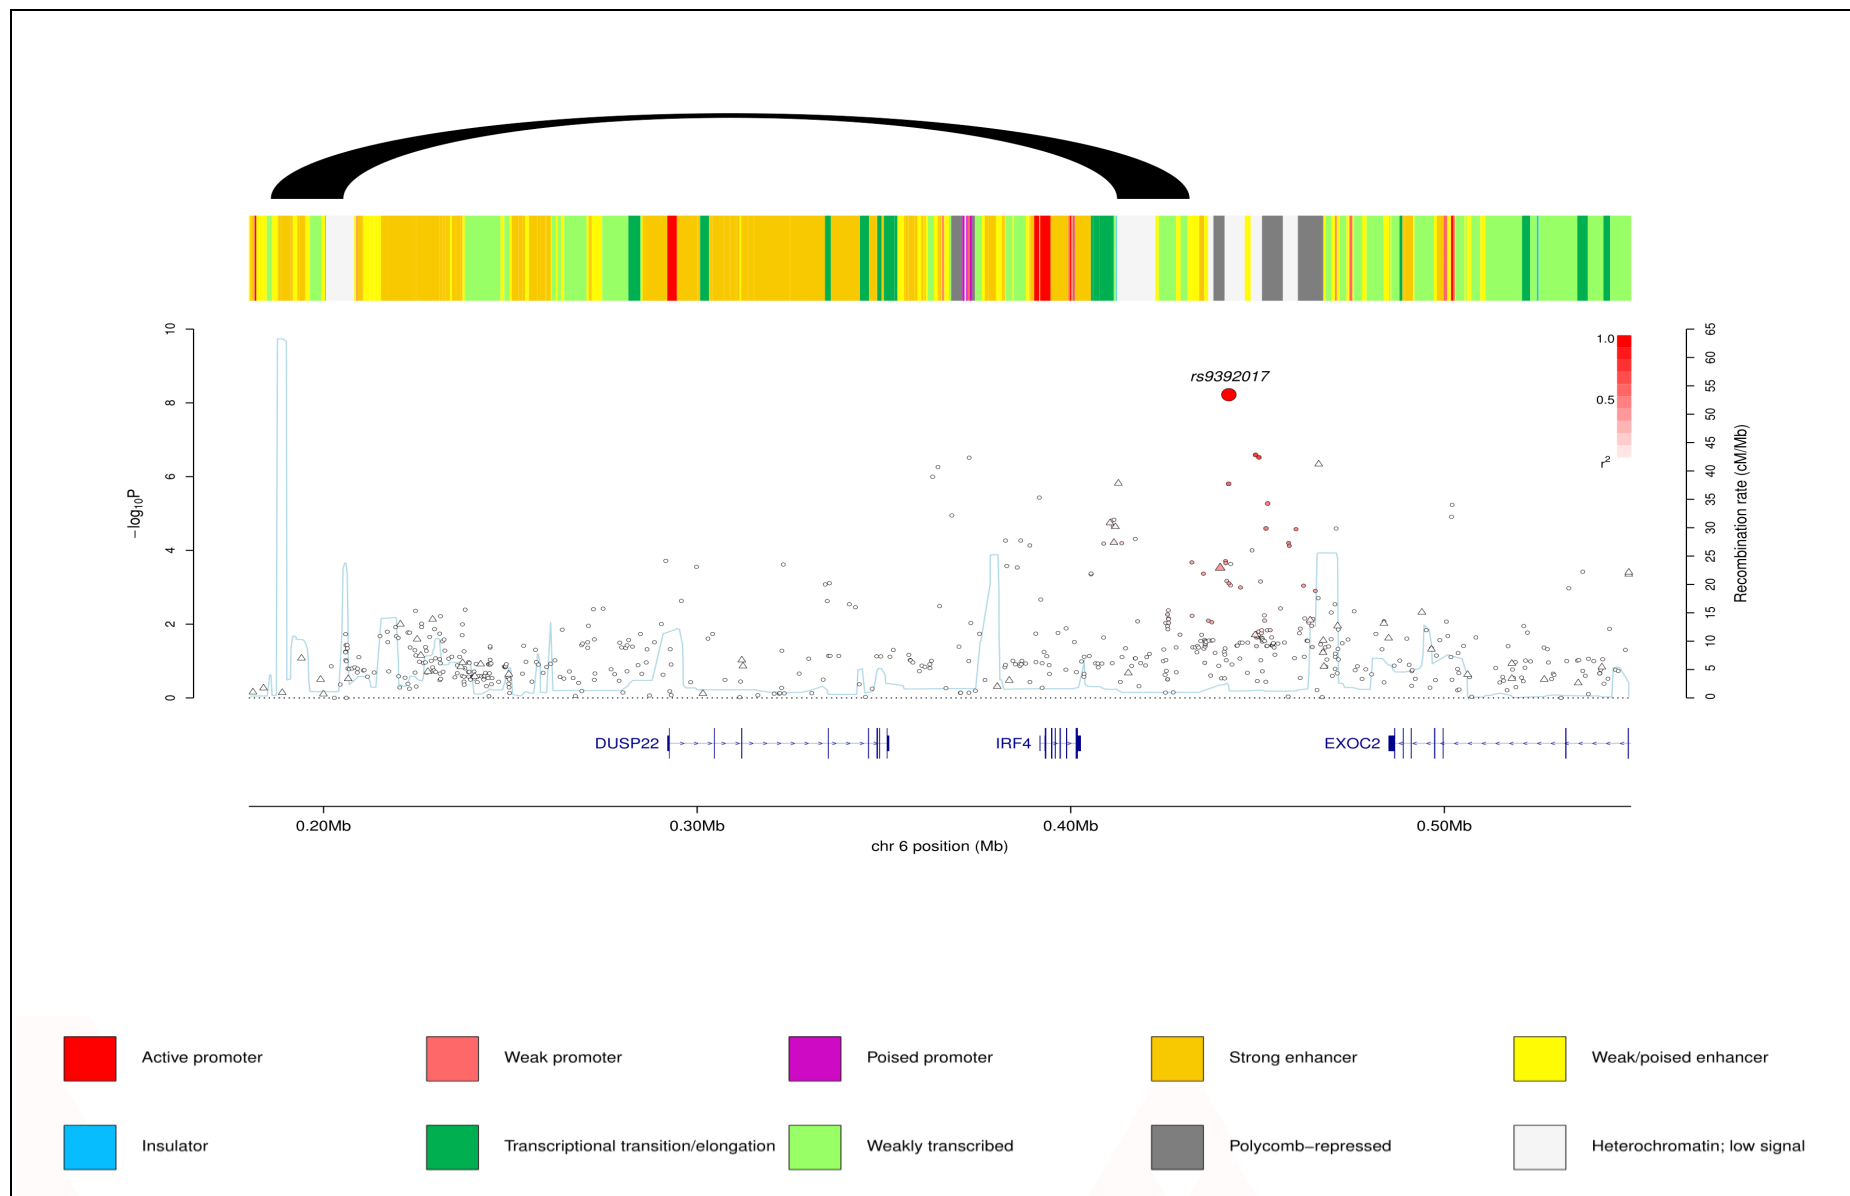

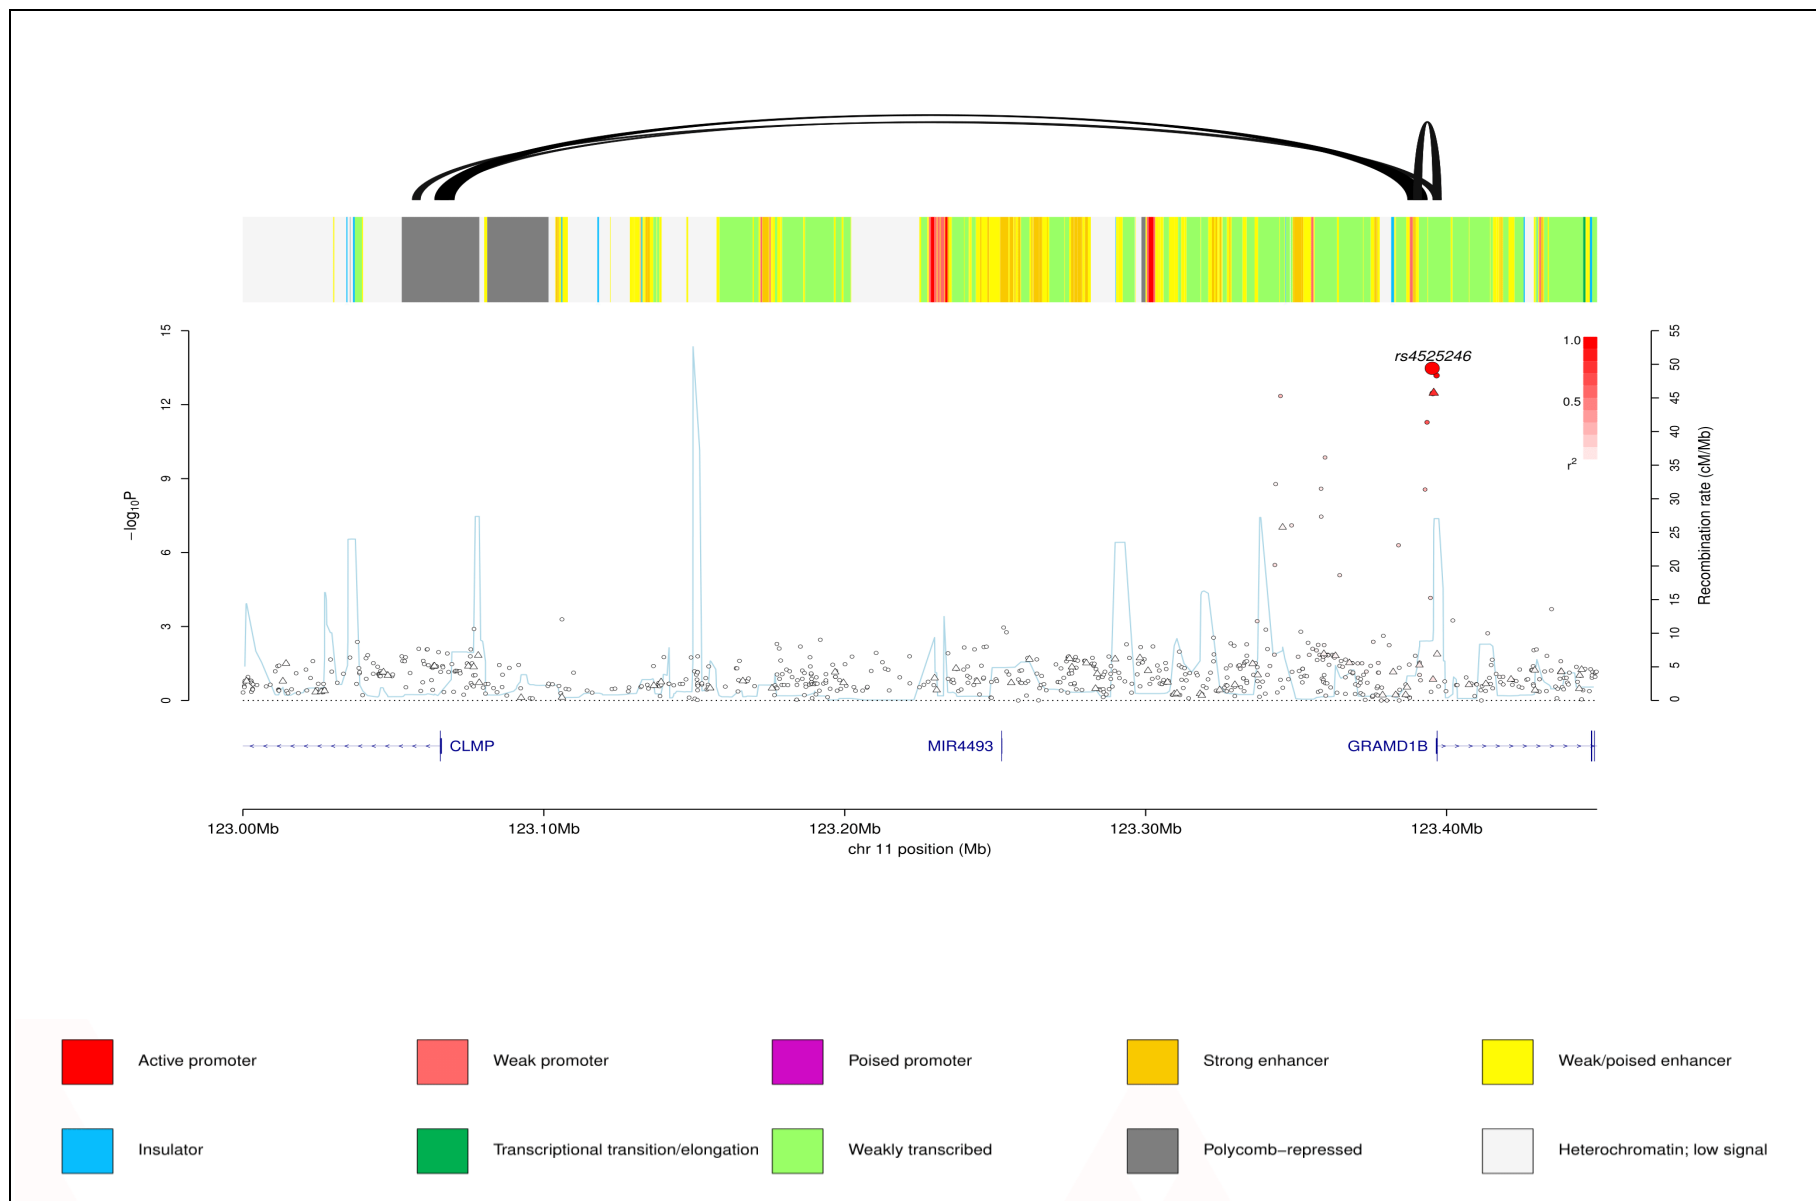

**Supplementary Figure 3:** Enrichment of transcription factors and histone marks using the variants that exhibited evidence of pleiotropy at a genome-wide significant level. The red line represents the Bonferroni corrected  $P$ -value threshold.

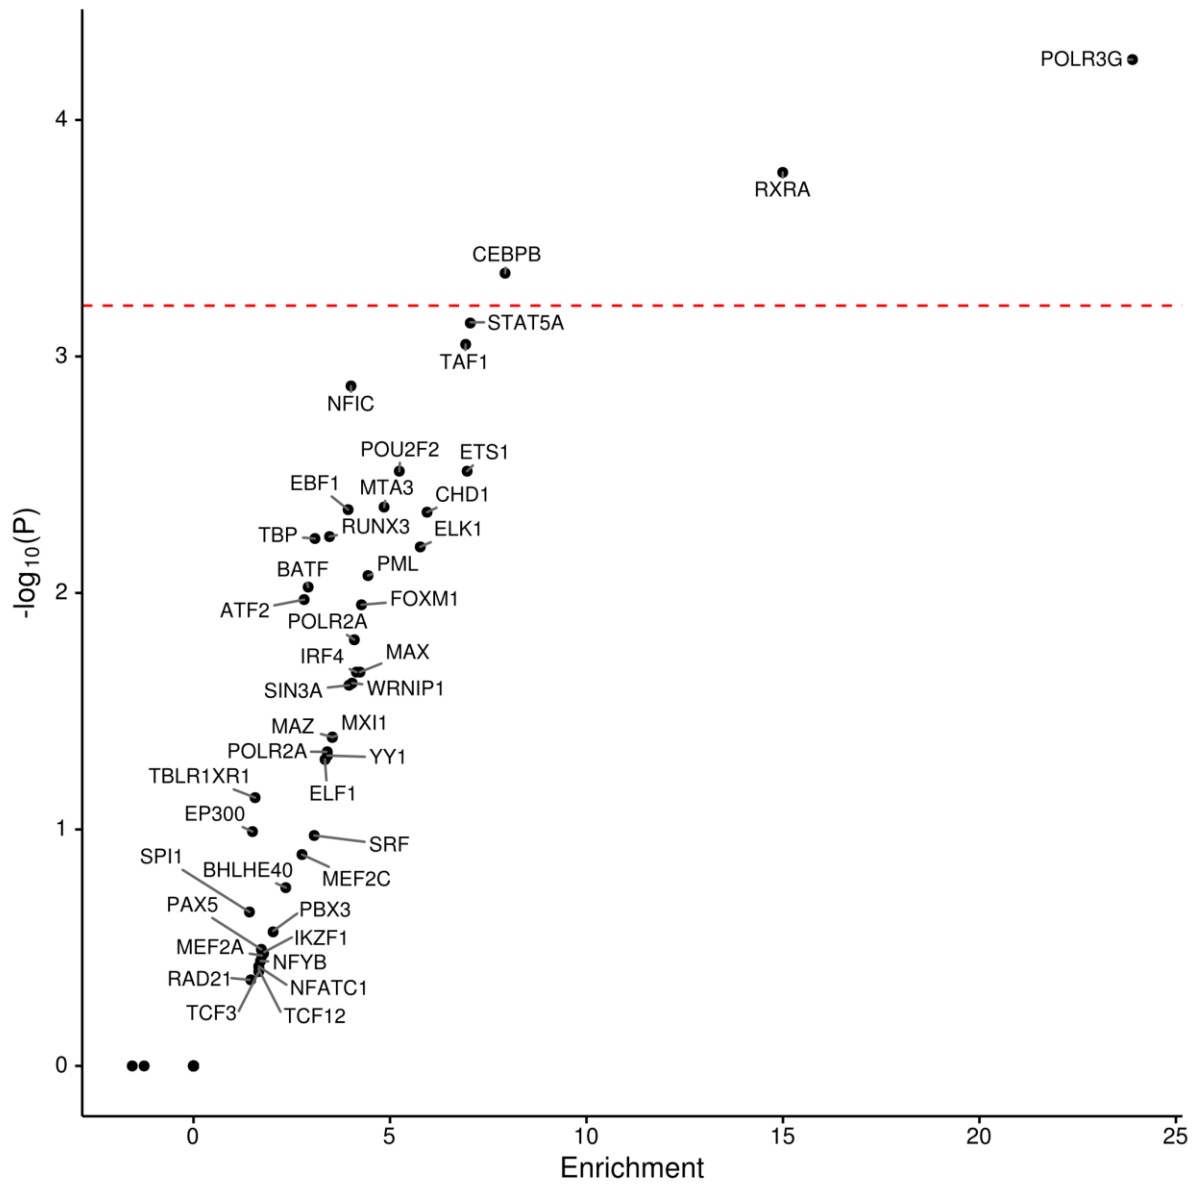

Supplement: srep41071-s1.pdf [file srep41071-s1.pdf]
